# Supplementary material for: Recent Advances in the Development of Nano-Sculpted Films by Magnetron Sputtering for Energy-Related Applications
Source: MDPI journal article supplement (doi:10.3390/nano10102039), 2020-10-15
Supplement: s1 [file s1]

## Supplementary Materials

# Recent Advances in the Development of Nano-Sculpted Films by Magnetron Sputtering for Energy-Related Applications

Adriano Panepinto <sup>1,\*</sup> and Rony Snyders <sup>1,2</sup>

<sup>1</sup> Chemistry of Plasma-Surface Interactions, University of Mons, 23 Place du Parc, 7000 Mons, Belgium; rony.snyders@umons.ac.be

<sup>2</sup> Materia Nova Research Center, Chemistry of Plasma-Surface Interactions, 3 Avenue Nicolas Copernic, 7000 Mons, Belgium

\* Correspondence: adriano.panepinto@umons.ac.be; Tel.: +32-(65)-554945

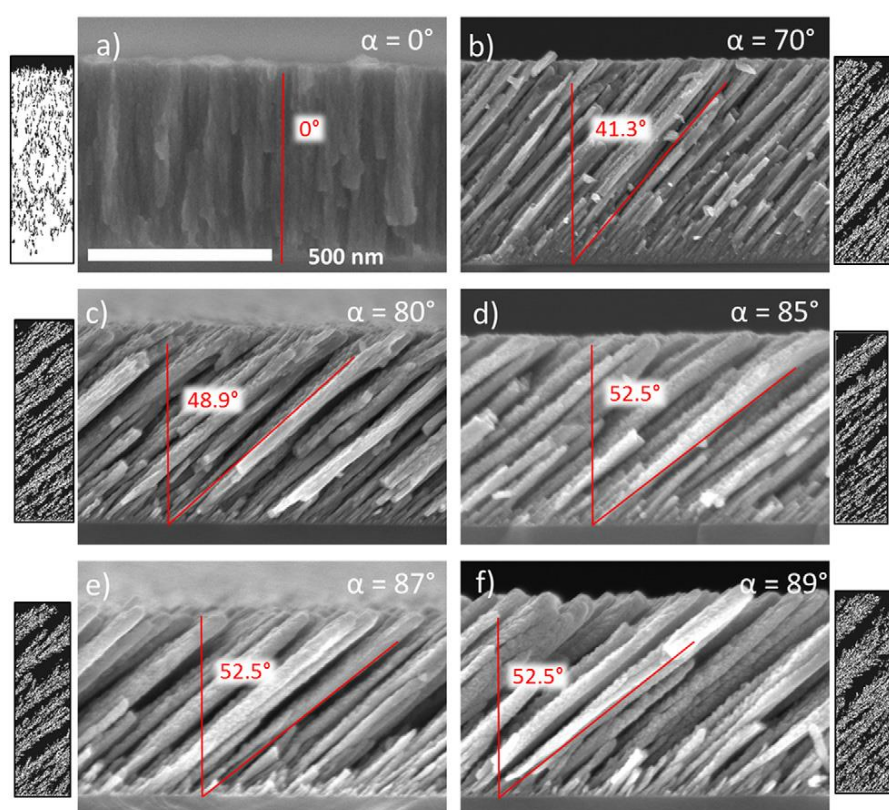

**Figure S1.** Ti thin films synthesized at 150 W, 0.13 Pa for various angle of deposition ( $\alpha$ ): (a)  $0^\circ$ ; (b)  $70^\circ$ ; (c)  $80^\circ$ ; (d)  $85^\circ$ ; (e)  $87^\circ$ ; (f)  $89^\circ$  with the corresponding simulations. The red angle accounts for the average columnar tilt angle ( $\beta$ ) estimated by over 20 columns.

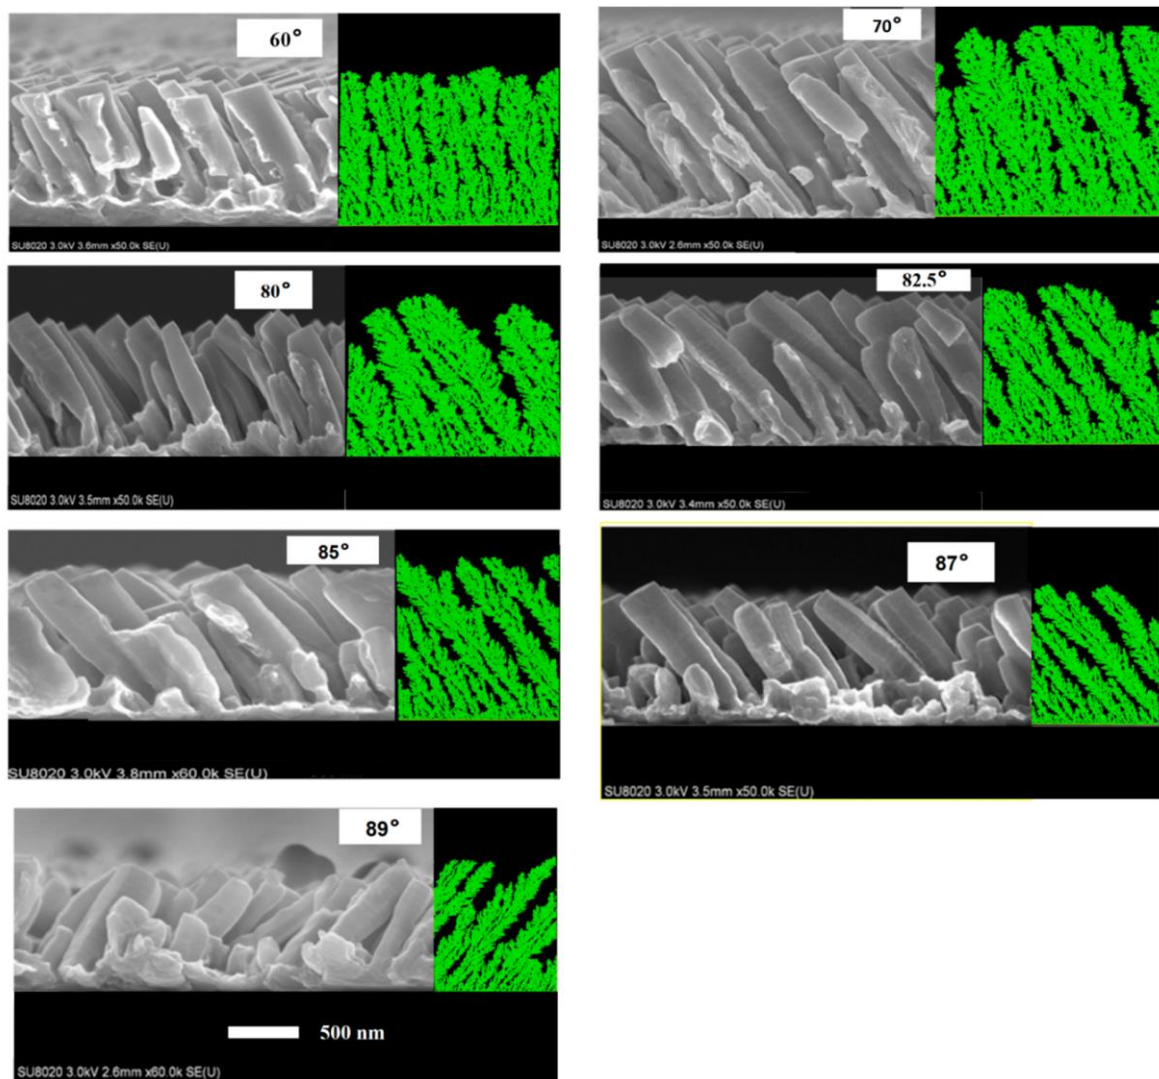

**Figure S2.** Mg thin films synthesized at 50 W, 0.26 Pa for various angle of deposition (from 60° to 89°) with the corresponding simulations.

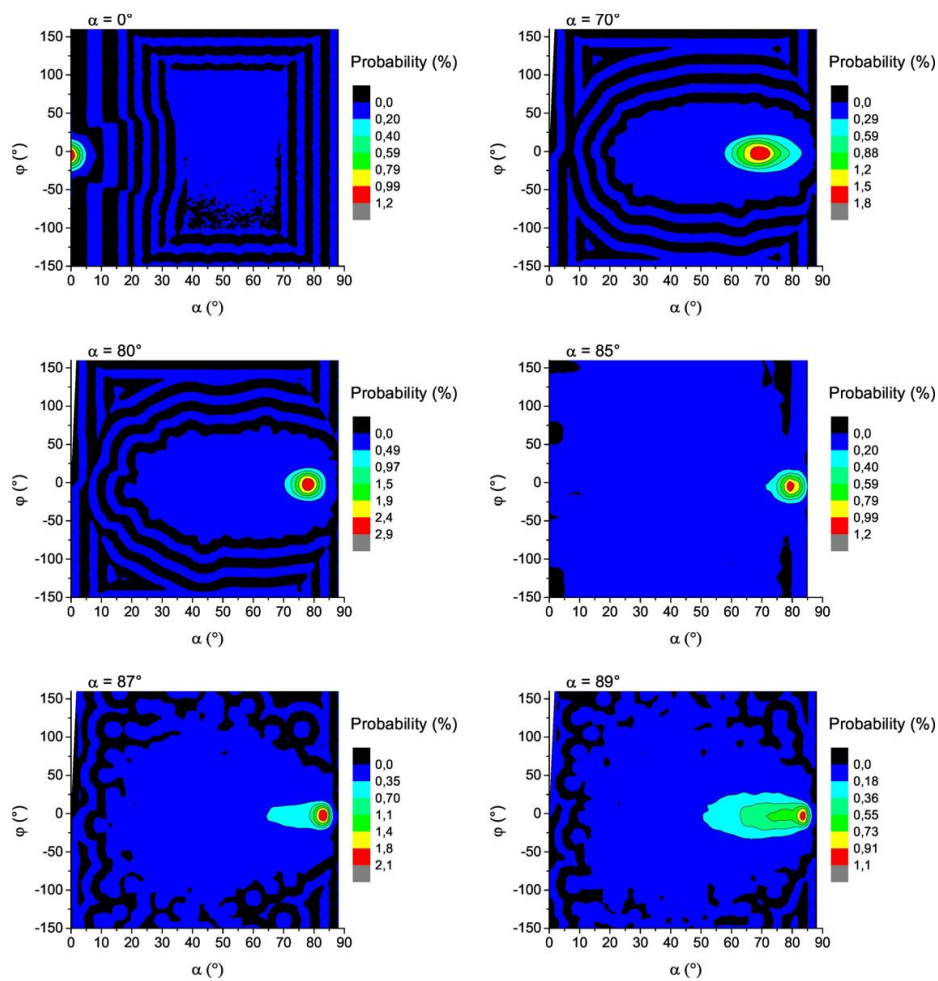

**Figure S3.** Angle distribution of particles reaching the substrate deposited at 0.13 Pa and 150 W calculated by SIMTRA (simulation of the metal transport) for various angle of deposition  $\alpha = 0, 70, 80, 85, 87, 89^\circ$ .

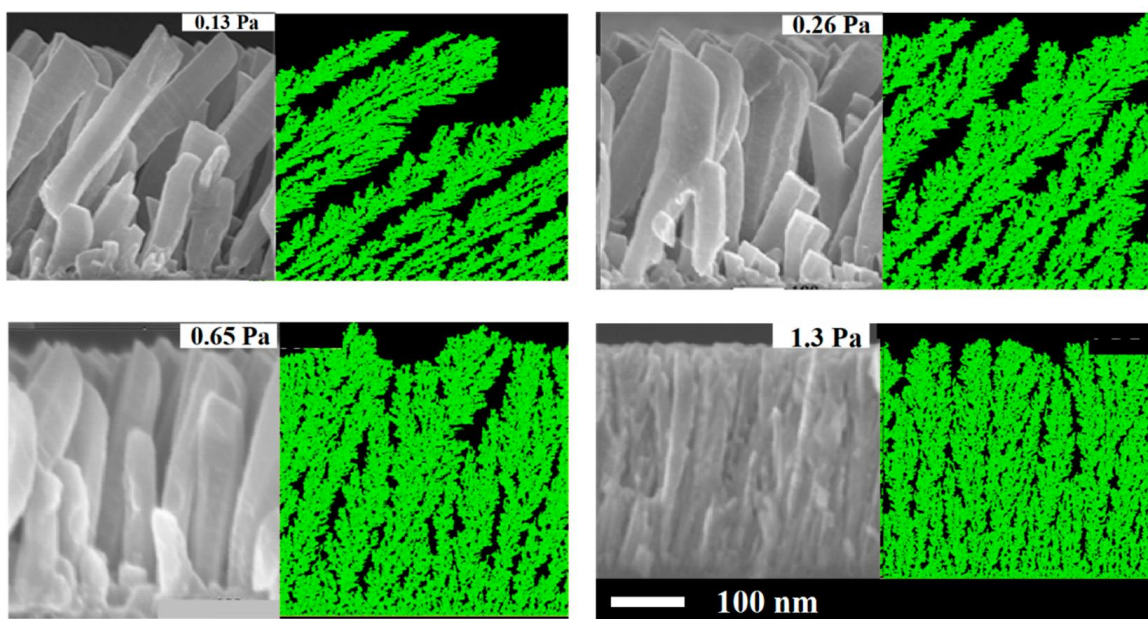

**Figure S4.** Mg thin films synthesized at 50 W and 85° for various deposition pressure (from 0.13 Pa to 1.30 Pa) with the corresponding simulations.

**Publisher's Note:** MDPI stays neutral with regard to jurisdictional claims in published maps and institutional affiliations.

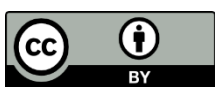

© 2020 by the authors. Submitted for possible open access publication under the terms and conditions of the Creative Commons Attribution (CC BY) license (<http://creativecommons.org/licenses/by/4.0/>).
